# Supplementary material for: Cytomegalovirus Infection Impairs the Mobilization of Tissue-Resident Innate Lymphoid Cells into the Peripheral Blood Compartment in Response to Acute Exercise
Source: MDPI journal article supplement (doi:10.3390/v13081535), 2021-08-03
Supplement: s1 [file s1]

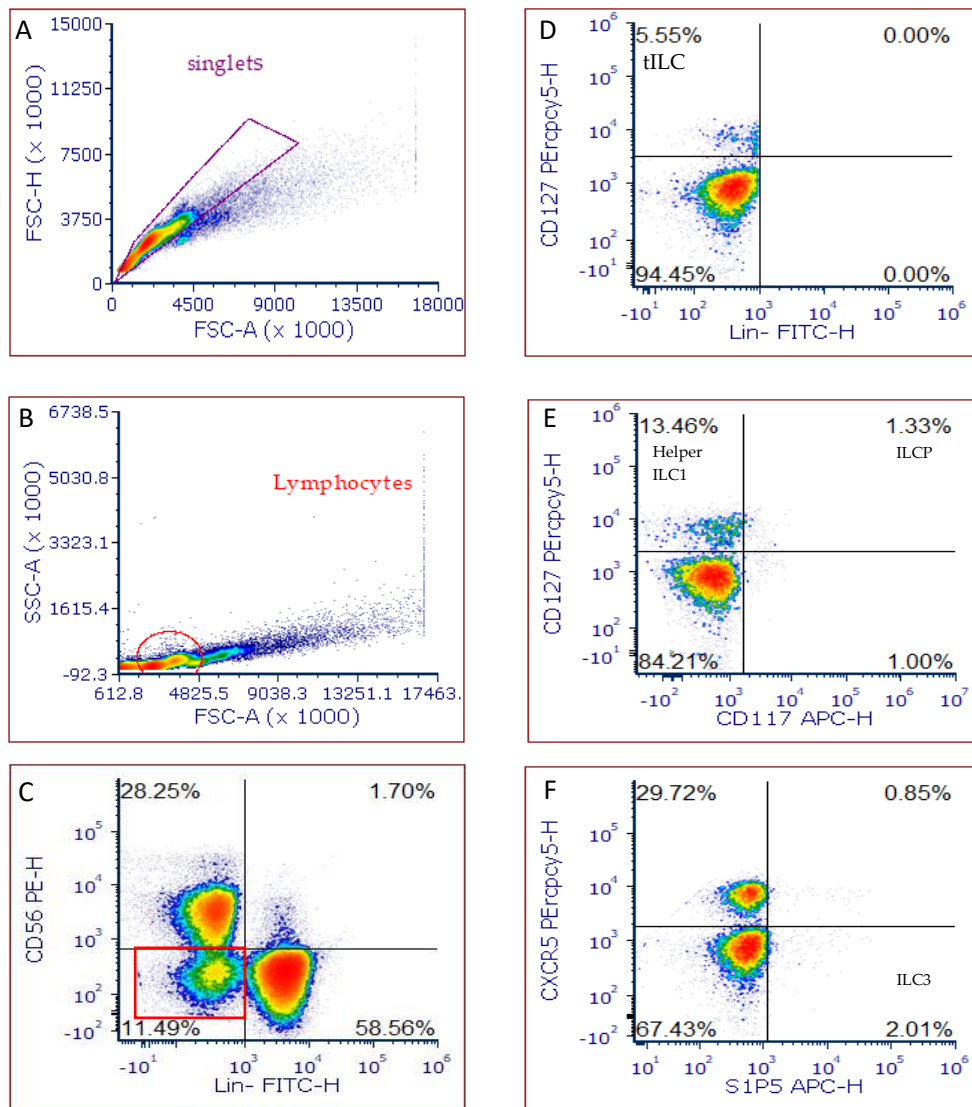

**Supplementary Figure S1.** The gating strategy for the different Innate Lymphoid Cell (ILC) subsets. Once single cells were identified (A), Peripheral Blood Mononuclear Cells (PBMCs) were gated (B) to isolate non-NK cells (C). Resting and post-exercise total ILC (tILC) (D), Helper ILC1 (E), ILCP (E) and ILC 3 (F) were quantified from this gate. Representative plots are displayed from a post-exercise CMV<sup>neg</sup> participant.

**Supplementary Table S1.** The number of NK cell expressing different Chemokine receptors before (pre) and after (post) exercise in all participants (n=22).

| Phenotype      | NK cell subtype        | Pre-Exercise (cell/uL) | Post-Exercise (cell/uL) | p-value |
|----------------|------------------------|------------------------|-------------------------|---------|
| CX3CR1+/CXCR1- | NK total               | 127.33±75.97           | 405.06±230.34           | p<0.001 |
|                | CD56 <sup>dim</sup>    | 112.22±71.12           | 367.18±207.30           | p<0.001 |
|                | CD56 <sup>bright</sup> | 6.23±3.0               | 46.80±15.77             | p<0.001 |
| CX3CR1+/CXCR1+ | NK total               | 18.98±15.49            | 79.06±52.90             | p<0.001 |
|                | CD56 <sup>dim</sup>    | 18.28±17.83            | 76.59±52.70             | p<0.001 |
|                | CD56 <sup>bright</sup> | 0.96±0.89              | 2.80±2.50               | p<0.001 |
| CX3CR1-/CXCR1+ | NK total               | 3.97±3.45              | 5.34±4.02               | p<0.05  |
|                | CD56 <sup>dim</sup>    | 3.71±3.09              | 4.06±3.8.3              | p>0.05  |
|                | CD56 <sup>bright</sup> | 0.39±0.34              | 1.00±1.16               | p<0.05  |
| CCR7+/CD62L-   | NK total               | 3.32±4.13              | 4.61±4.08               | p>0.05  |
|                | CD56 <sup>dim</sup>    | 3.35±4.30              | 4.57±4.11               | p>0.05  |
|                | CD56 <sup>bright</sup> | 0.09±0.22              | 0.15±0.18               | p>0.05  |
| CCR7+/CD62L+   | NK total               | 6.38±4.22              | 10.94±6.65              | p<0.001 |
|                | CD56 <sup>dim</sup>    | 5.25±3.53              | 9.16±5.81               | p<0.001 |
|                | CD56 <sup>bright</sup> | 1.26±1.03              | 2.04±2.40               | p>0.05  |
| CCR7-/CD62L+   | NK total               | 73.74±32.30            | 186.66±87.22            | p<0.001 |
|                | CD56 <sup>dim</sup>    | 61.61±30.06            | 161.41±77.48            | p<0.001 |
|                | CD56 <sup>bright</sup> | 11.37±5.65             | 24.01±16.7              | p<0.001 |
| CXCR3+/CCR4-   | NK total               | 8.45±4.76              | 21.17±14.94             | p<0.001 |
|                | CD56 <sup>dim</sup>    | 4.42±2.63              | 11.37±10.08             | p<0.001 |
|                | CD56 <sup>bright</sup> | 3.81±2.86              | : 8.51±5.18             | p<0.001 |
| CXCR3+/CCR4+   | NK total               | 0.42±0.32              | 1.17±1.18               | p<0.01  |
|                | CD56 <sup>dim</sup>    | 0.14±0.15              | 0.52±0.90               | p<0.05  |
|                | CD56 <sup>bright</sup> | 0.25±0.24              | 0.62±0.67               | p<0.01  |
| CXCR3-/CCR4+   | NK total               | 2.02±1.53              | 8.38±12.17              | p<0.05  |
|                | CD56 <sup>dim</sup>    | 1.66±1.41              | 7.62±11.50              | p<0.05  |
|                | CD56 <sup>bright</sup> | 1.41±1.29              | 0.81±0.83               | p<0.01  |
| CCR6+/CCR4-    | NK total               | 4.66 2.72              | 11.32±6.64              | p<0.001 |
|                | CD56 <sup>dim</sup>    | 1.61±1.16              | 4.35±4.11               | p<0.01  |
|                | CD56 <sup>bright</sup> | 3.43±2.66              | 7±5.51                  | p<0.001 |
| CCR6+/CCR4+    | NK total               | 0.32±0.29              | 0.75±0.58               | p<0.001 |
|                | CD56 <sup>dim</sup>    | 0.09±0.17              | 0.35±0.58               | p<0.05  |

|                      |                        |           |             |         |
|----------------------|------------------------|-----------|-------------|---------|
|                      | CD56 <sup>bright</sup> | 0.26±0.27 | 0.42±0.41   | p<0.01  |
| <b>CCR6-/CCR4+</b>   | NK total               | 2.26±1.63 | 6.98±9.25   | p<0.05  |
|                      | CD56 <sup>dim</sup>    | 1.77±1.34 | 6.01±8.40   | p<0.05  |
|                      | CD56 <sup>bright</sup> | 0.54±0.40 | 0.97±0.96   | p<0.01  |
| <b>CXCR5+/S1P5-</b>  | NK total               | 5.09±2.40 | 12.37±8.42  | p<0.001 |
|                      | CD56 <sup>dim</sup>    | 1.97±1.32 | 5.87±5.86   | p<0.01  |
|                      | CD56 <sup>bright</sup> | 3.23±1.83 | 7.17±4.84   | p<0.001 |
| <b>CXCR5+/S1P5+</b>  | NK total               | 0.44±0.34 | 1.31±1.90   | p<0.05  |
|                      | CD56 <sup>dim</sup>    | 0.07±0.08 | 0.38±1.10   | p>0.05  |
|                      | CD56 <sup>bright</sup> | 0.39±0.29 | 1.04±1.12   | p<0.01  |
| <b>CXCR5-/S1P5+</b>  | NK total               | 2.43±1.34 | 7.12±9.76   | p<0.05  |
|                      | CD56 <sup>dim</sup>    | 1.69±1.04 | 5.50±8.92   | p<0.05  |
|                      | CD56 <sup>bright</sup> | 9.24±5.15 | 25.79±13.46 | p<0.001 |
| <b>CCR7+/CXCR4-</b>  | NK total               | 4.45±1.53 | 10.72±4.88  | p<0.001 |
|                      | CD56 <sup>dim</sup>    | 1.92±1.08 | 4.89±3.50   | p<0.001 |
|                      | CD56 <sup>bright</sup> | 2.57±1.49 | 5.72±3.52   | p<0.001 |
| <b>CCR7+/CXCR4+</b>  | NK total               | 1.66±1.4  | 3.16±3.38   | p<0.05  |
|                      | CD56 <sup>dim</sup>    | 1.55±1.36 | 2.78±3.16   | p<0.05  |
|                      | CD56 <sup>bright</sup> | 0.15±0.14 | 0.25±0.35   | p>0.05  |
| <b>CCR7-/CXCR4+</b>  | NK total               | 3.76±2.85 | 7.68±3.89   | p<0.001 |
|                      | CD56 <sup>dim</sup>    | 3.33±2.86 | 6.96±3.48   | p<0.001 |
|                      | CD56 <sup>bright</sup> | 0.37±0.31 | 0.52±0.45   | p>0.05  |
| <b>CXCR6+/LFA-1-</b> | NK total               | 4.36±2.56 | 11.78±6.56  | p<0.001 |
|                      | CD56 <sup>dim</sup>    | 2.78±1.81 | 7.79±5.11   | p<0.001 |
|                      | CD56 <sup>bright</sup> | 1.77±1.29 | 3.70±2.13   | p<0.001 |
| <b>CXCR6+/LFA-1+</b> | NK total               | 0.87±0.79 | 2.16±2.40   | p<0.01  |
|                      | CD56 <sup>dim</sup>    | 0.65±0.52 | 1.66±1.59   | p<0.001 |
|                      | CD56 <sup>bright</sup> | 0.11±0.10 | 0.35±0.50   | p<0.01  |
| <b>CXCR6-/LFA-1+</b> | NK total               | 1.22±1.35 | 3.75±4.09   | p<0.05  |
|                      | CD56 <sup>dim</sup>    | 1.00±1.30 | 3.23±4.16   | p<0.05  |
|                      | CD56 <sup>bright</sup> | 0.25±0.20 | 0.45±0.41   | p<0.05  |
